# Supplementary material for: High CO2 Adsorption Enthalpy Enabled by Uncoordinated N-Heteroatom Sites of a 3D Metal-Organic Framework
Source: Hindawi journal article supplement (doi:10.1155/2019/4712807), 2019-12-21
Supplement: f1 [file 4712807.f1.doc]

**Supplementary Information**

**High CO2 adsorption enthalpy enabled by uncoordinated N-heteroatom sites of a 3D metal-organic framework**

Yongting Zhao *a*,*, Yiming Xie *b*

***a*** *College [of](../../../../D:/WPS/Youdao/Dict/8.5.1.0/resultui/html/index.html" \l "/javascript:;) [Chemistry](../../../../D:/WPS/Youdao/Dict/8.5.1.0/resultui/html/index.html" \l "/javascript:;) [and](../../../../D:/WPS/Youdao/Dict/8.5.1.0/resultui/html/index.html" \l "/javascript:;) [Chemical](../../../../D:/WPS/Youdao/Dict/8.5.1.0/resultui/html/index.html" \l "/javascript:;) [Engineering](../../../../D:/WPS/Youdao/Dict/8.5.1.0/resultui/html/index.html" \l "/javascript:;), Anshun University, Anshun, 561000, China.*

***b*** *College of Materials Science and Engineering, Huaqiao University, Quanzhou, 362021, China.*

*Corresponding author.

Yongting Zhao, majoring in coordination polymers, E-mail:ydrmakeit2008@163.com

All reagents, including MnSO4·H2O, 5-(pyridin-2-yl)-3, 3'-bi (1*H*-1, 2, 4-triazole) (H2L), N, N'-dimethylformamide (DMF) were commercially exploitable sources and used without further refinement. The thermal analysis (TGA) experiments were done on a STA 449 F3, the sample in an alumina crucible was heated in a nitrogen ambience with heating speed of 10 oC/ min. The patterns of powdered X-ray diffraction (PXRD) were collecten on MiniFlex Ⅱ X-ray Diffractometer. The single crystal data for the microporosity of compound **1** is carried out on Oxford X-ray Diffractometer (50Kv,0.8mA) with Mo-Kɑ radiation (λ=0.71073nm) at 293(2)K. Gas adsorption isotherms for activated samples were collected by Micromeritics ASAP 2020 surface-area and pore–size analyzer.

**Table 1S** Crystal data and structure refinement parameters for **1**.

|  | **1** |
| --- | --- |
| Empirical formula | C21H21Mn2N15O3 |
| Mr | 641.41 |
| T/K | 293(2) |
| Crystal system | Tetragonal |
| Space group | *I* 41/*a* |
| a/Å | 19.557（7） |
| b/Å | 19.557（7） |
| c/Å | 20.116（10） |
| α (°) | 90.00 |
| β (°) | 90.00 |
| γ (°) | 90.00 |
| V/Å3 | 7694（5） |
| Z | 16 |
| Dc/mg m-3 | 0.981 |
| μ/mm -1 | 0.686 |
| indep reflns [*I* >2σ(*I*)] | 3396 |
| F(000) | 2288 |
| GOF | 1.078 |
| θ range (˚) | 2.91-25.02 |
| R1*a*,wR2b [*I* >2σ(*I*)] | 0.0485, 0.1255 |
| R1*a*, wR2b (all data) | 0.0633,0.1343 |

**Table 2S** Selected bond lengths [Å] and angles [°] for **1**.

| Mn(1)-O(1W) | 2.159(2) | Mn(1)-N(6) | 2.234(2) |
| --- | --- | --- | --- |
| Mn(1)-N(2)#1 | 2.210(2) | Mn(1)-N(4) | 2.299(2) |
| Mn(1)-N(7)#2 | 2.215(2) | Mn(1)-N(1)#1 | 2.305(3) |
| O(1W)-Mn(1)-N(2)#1 | 96.72(8) | O(1W)-Mn(1)-N(7)#2 | 91.51(11) |
| N(2)#1-Mn(1)-N(7)#2 | 90.29(9) | O(1W)-Mn(1)-N(6) | 96.39(9) |
| N(2)#1-Mn(1)-N(6) | 164.50(9) | N(7)#2-Mn(1)-N(6) | 97.60(9) |
| O(1W)-Mn(1)-N(4) | 92.42(10) | N(2)#1-Mn(1)-N(4) | 97.16(9) |
| N(7)#2-Mn(1)-N(4) | 171.11(9) | N(6)-Mn(1)-N(4) | 74.03(9) |
| O(1W)-Mn(1)-N(1)#1 | 170.19(9) | N(2)#1-Mn(1)-N(1)#1 | 74.33(9) |
| N(7)#2-Mn(1)-N(1)#1 | 92.53(11) | N(6)-Mn(1)-N(1)#1 | 91.93(10) |
| N(4)-Mn(1)-N(1)#1 | 84.87(10) |  |  |

Symmetry codes:a y-3/4,-x+5/4,z+1/4;  b -x+1,-y+2,-z.

**Table 3S** The pore size distribution of the **compound 1**.

| Pore Width  (nm) | Cumulative  Volume  (cm3/g) | Incremental Volume  (cm3/g) | Cumulative Area  (m2/g) | Incremental Area(m2/g) |
| --- | --- | --- | --- | --- |
| 8.04 | 0.00253 | 0.00253 | 6.294 | 6.294 |
| 8.58 | 0.03269 | 0.03016 | 76.607 | 70.313 |
| 9.29 | 0.03269 | 0.00000 | 76.607 | 0.000 |
| 10.01 | 0.03269 | 0.00000 | 76.607 | 0.000 |
| 10.90 | 0.03269 | 0.00000 | 76.607 | 0.000 |
| 11.79 | 0.03269 | 0.00000 | 76.607 | 0.000 |
| 12.69 | 0.04813 | 0.01544 | 100.950 | 24.343 |
| 13.58 | 0.04868 | 0.00055 | 101.754 | 0.804 |
| 14.83 | 0.04913 | 0.00045 | 102.361 | 0.606 |
| 15.91 | 0.04999 | 0.00086 | 103.441 | 1.080 |
| 17.16 | 0.04999 | 0.00000 | 103.441 | 0.000 |
| 18.59 | 0.04999 | 0.00000 | 103.441 | 0.000 |
| 20.02 | 0.04999 | 0.00000 | 103.441 | 0.000 |
| 21.62 | 0.04999 | 0.00000 | 103.441 | 0.000 |
| 23.41 | 0.05032 | 0.00033 | 103.725 | 0.284 |
| 25.20 | 0.05145 | 0.00113 | 104.625 | 0.900 |
| 27.34 | 0.05221 | 0.00076 | 105.178 | 0.553 |
| 29.49 | 0.05277 | 0.00056 | 105.555 | 0.377 |
| 31.81 | 0.05354 | 0.00078 | 106.043 | 0.488 |
| 34.31 | 0.05450 | 0.00095 | 106.599 | 0.557 |
| 36.99 | 0.05534 | 0.00085 | 107.058 | 0.458 |
| 40.03 | 0.05647 | 0.00113 | 107.620 | 0.562 |
| 43.25 | 0.05795 | 0.00148 | 108.305 | 0.685 |
| 46.64 | 0.05983 | 0.00188 | 109.111 | 0.806 |
| 50.40 | 0.06185 | 0.00202 | 109.912 | 0.802 |
| 54.33 | 0.06395 | 0.00210 | 110.687 | 0.775 |
| 58.80 | 0.06612 | 0.00217 | 111.424 | 0.737 |
| 63.44 | 0.06855 | 0.00243 | 112.191 | 0.767 |
| 68.45 | 0.07127 | 0.00272 | 112.986 | 0.795 |
| 73.99 | 0.07359 | 0.00232 | 113.613 | 0.627 |
| 79.88 | 0.07584 | 0.00224 | 114.175 | 0.562 |
| 86.32 | 0.07879 | 0.00295 | 114.858 | 0.683 |
| 93.11 | 0.08229 | 0.00351 | 115.612 | 0.753 |
| 100.61 | 0.08505 | 0.00276 | 116.159 | 0.548 |
| 108.66 | 0.08723 | 0.00218 | 116.560 | 0.401 |
| 117.23 | 0.08949 | 0.00226 | 116.946 | 0.386 |
| 126.53 | 0.09188 | 0.00239 | 117.323 | 0.378 |
| 136.71 | 0.09418 | 0.00230 | 117.660 | 0.337 |
| 147.61 | 0.09634 | 0.00216 | 117.953 | 0.293 |
| 159.41 | 0.09834 | 0.00201 | 118.204 | 0.252 |
| 172.10 | 0.10025 | 0.00190 | 118.425 | 0.221 |
| 185.86 | 0.10209 | 0.00185 | 118.624 | 0.199 |
| 200.69 | 0.10384 | 0.00174 | 118.798 | 0.174 |
| 216.60 | 0.10552 | 0.00168 | 118.953 | 0.155 |
| 233.93 | 0.10723 | 0.00171 | 119.100 | 0.146 |
| 252.52 | 0.10891 | 0.00168 | 119.233 | 0.133 |
| 272.71 | 0.11051 | 0.00160 | 119.350 | 0.117 |
| 294.51 | 0.11163 | 0.00112 | 119.426 | 0.076 |
| 317.92 | 0.11268 | 0.00105 | 119.492 | 0.066 |
| 343.30 | 0.11408 | 0.00139 | 119.573 | 0.081 |
| 370.64 | 0.11553 | 0.00146 | 119.652 | 0.079 |
| 400.31 | 0.11708 | 0.00155 | 119.729 | 0.078 |
| 432.30 | 0.11824 | 0.00116 | 119.783 | 0.054 |
| 466.79 | 0.11931 | 0.00107 | 119.829 | 0.046 |
| 503.96 | 0.12061 | 0.00131 | 119.880 | 0.052 |
| 544.17 | 0.12179 | 0.00118 | 119.924 | 0.043 |
| 587.60 | 0.12260 | 0.00081 | 119.951 | 0.028 |
| 634.42 | 0.12334 | 0.00074 | 119.975 | 0.023 |
